# Supplementary material
Source: publisher figshare collection journal article supplement (https://acs.figshare.com/ndownloader/files/4383859)
Supplement: Supplementary file 1 [file 4383859]

 
data_1 
 
_audit_creation_method            SHELXL-97 
_chemical_name_systematic 
; 
 ? 
; 
_chemical_name_common             ? 
_chemical_melting_point           ? 
_chemical_formula_moiety          'C37 H31 Fe N2 P S' 
_chemical_formula_sum             'C37 H31 Fe N2 P S' 
_chemical_formula_weight          622.52 
 
loop_ 
 _atom_type_symbol 
 _atom_type_description 
 _atom_type_scat_dispersion_real 
 _atom_type_scat_dispersion_imag 
 _atom_type_scat_source 
 'C'  'C'   0.0033   0.0016 
 'International Tables Vol C Tables 4.2.6.8 and 6.1.1.4' 
 'H'  'H'   0.0000   0.0000 
 'International Tables Vol C Tables 4.2.6.8 and 6.1.1.4' 
 'N'  'N'   0.0061   0.0033 
 'International Tables Vol C Tables 4.2.6.8 and 6.1.1.4' 
 'P'  'P'   0.1023   0.0942 
 'International Tables Vol C Tables 4.2.6.8 and 6.1.1.4' 
 'S'  'S'   0.1246   0.1234 
 'International Tables Vol C Tables 4.2.6.8 and 6.1.1.4' 
 'Fe'  'Fe'   0.3463   0.8444 
 'International Tables Vol C Tables 4.2.6.8 and 6.1.1.4' 
 
_symmetry_cell_setting           'Orthorhombic'
_symmetry_space_group_name_H-M   'P 21 21 21'
_symmetry_space_group_name_Hall  'P 2ac 2ab'
 
loop_ 
 _symmetry_equiv_pos_as_xyz 
 'x, y, z' 
 '-x+1/2, -y, z+1/2' 
 '-x, y+1/2, -z+1/2' 
 'x+1/2, -y+1/2, -z' 
 
_cell_length_a                    11.9314(4) 
_cell_length_b                    14.6278(5) 
_cell_length_c                    17.7556(7) 
_cell_angle_alpha                 90.00 
_cell_angle_beta                  90.00 
_cell_angle_gamma                 90.00 
_cell_volume                      3098.89(19) 
_cell_formula_units_Z             4 
_cell_measurement_temperature     298(2) 
_cell_measurement_reflns_used     3689
_cell_measurement_theta_min       2.48
_cell_measurement_theta_max       20.85 
 
_exptl_crystal_description        'Cubic' 
_exptl_crystal_colour             'Orange' 
_exptl_crystal_size_max           0.26 
_exptl_crystal_size_mid           0.19 
_exptl_crystal_size_min           0.15 
_exptl_crystal_density_meas       ? 
_exptl_crystal_density_diffrn     1.334 
_exptl_crystal_density_method     'not measured' 
_exptl_crystal_F_000              1296 
_exptl_absorpt_coefficient_mu     0.635 
_exptl_absorpt_correction_type    'none'
_exptl_absorpt_correction_T_min   ?
_exptl_absorpt_correction_T_max   ?
_exptl_absorpt_process_details    ? 
 
_exptl_special_details 
; 
 ? 
; 
 
_diffrn_ambient_temperature       298(2) 
_diffrn_radiation_wavelength      0.71073 
_diffrn_radiation_type           'MoK\a'
_diffrn_radiation_source         'sealed tube'
_diffrn_radiation_monochromator  'graphite'
_diffrn_measurement_device_type  'CCD area detector'
_diffrn_measurement_method       'phi and omega scans'
_diffrn_detector_area_resol_mean  ? 
_diffrn_standards_number          ? 
_diffrn_standards_interval_count  ? 
_diffrn_standards_interval_time   ? 
_diffrn_standards_decay_%         ? 
_diffrn_reflns_number             17161 
_diffrn_reflns_av_R_equivalents   0.0416 
_diffrn_reflns_av_sigmaI/netI     0.0512 
_diffrn_reflns_limit_h_min        -13 
_diffrn_reflns_limit_h_max        14 
_diffrn_reflns_limit_k_min        -17 
_diffrn_reflns_limit_k_max        17 
_diffrn_reflns_limit_l_min        -21 
_diffrn_reflns_limit_l_max        21 
_diffrn_reflns_theta_min          1.80 
_diffrn_reflns_theta_max          25.00 
_reflns_number_total              5440 
_reflns_number_gt                 4640 
_reflns_threshold_expression      >2sigma(I) 
 
_computing_data_collection      'Bruker SMART'
_computing_cell_refinement      'Bruker SMART'
_computing_data_reduction       'Bruker SAINT'
_computing_structure_solution   'Bruker SHELXTL'
_computing_structure_refinement 'Bruker SHELXTL'
_computing_molecular_graphics   'Bruker SHELXTL'
_computing_publication_material 'Bruker SHELXTL'
 
_refine_special_details 
; 
 Refinement of F^2^ against ALL reflections.  The weighted R-factor wR and 
 goodness of fit S are based on F^2^, conventional R-factors R are based 
 on F, with F set to zero for negative F^2^. The threshold expression of 
 F^2^ > 2sigma(F^2^) is used only for calculating R-factors(gt) etc. and is 
 not relevant to the choice of reflections for refinement.  R-factors based 
 on F^2^ are statistically about twice as large as those based on F, and R- 
 factors based on ALL data will be even larger. 
; 
 
_refine_ls_structure_factor_coef  Fsqd  
_refine_ls_matrix_type            full 
_refine_ls_weighting_scheme       calc  
_refine_ls_weighting_details 
 'calc w=1/[\s^2^(Fo^2^)+(0.0363P)^2^+0.0000P] where P=(Fo^2^+2Fc^2^)/3' 
_atom_sites_solution_primary      direct 
_atom_sites_solution_secondary    difmap 
_atom_sites_solution_hydrogens    geom 
_refine_ls_hydrogen_treatment     constr 
_refine_ls_extinction_method      none 
_refine_ls_extinction_coef        ? 
_refine_ls_abs_structure_details 
 'Flack H D (1983), Acta Cryst. A39, 876-881' 
_refine_ls_abs_structure_Flack    0.015(14) 
_chemical_absolute_configuration  ad
_refine_ls_number_reflns          5440 
_refine_ls_number_parameters      379 
_refine_ls_number_restraints      0 
_refine_ls_R_factor_all           0.0466 
_refine_ls_R_factor_gt            0.0360 
_refine_ls_wR_factor_ref          0.0796 
_refine_ls_wR_factor_gt           0.0753 
_refine_ls_goodness_of_fit_ref    1.010 
_refine_ls_restrained_S_all       1.010 
_refine_ls_shift/su_max           0.001 
_refine_ls_shift/su_mean          0.000 
 
loop_ 
 _atom_site_label 
 _atom_site_type_symbol 
 _atom_site_fract_x 
 _atom_site_fract_y 
 _atom_site_fract_z 
 _atom_site_U_iso_or_equiv 
 _atom_site_adp_type 
 _atom_site_occupancy 
 _atom_site_symmetry_multiplicity 
 _atom_site_calc_flag 
 _atom_site_refinement_flags 
 _atom_site_disorder_assembly 
 _atom_site_disorder_group 
Fe1 Fe -0.83611(3) 1.27165(3) 0.64332(2) 0.03703(12) Uani 1 1 d . . . 
P1 P -0.87081(6) 1.04574(5) 0.67430(5) 0.0416(2) Uani 1 1 d . . . 
S1 S -0.61406(8) 0.93728(7) 0.59835(6) 0.0771(3) Uani 1 1 d . . . 
N2 N -0.57898(18) 1.07019(15) 0.70404(14) 0.0377(6) Uani 1 1 d . . . 
C1 C -0.9387(3) 1.3647(2) 0.5908(2) 0.0649(10) Uani 1 1 d . . . 
H1A H -0.9860 1.4097 0.6165 0.078 Uiso 1 1 calc R . . 
C2 C -0.8290(3) 1.3784(2) 0.5694(2) 0.0636(10) Uani 1 1 d . . . 
H2A H -0.7858 1.4348 0.5759 0.076 Uiso 1 1 calc R . . 
C3 C -0.7909(3) 1.2968(3) 0.53488(19) 0.0669(11) Uani 1 1 d . . . 
H3A H -0.7168 1.2865 0.5126 0.080 Uiso 1 1 calc R . . 
C4 C -0.8809(3) 1.2329(2) 0.53772(16) 0.0563(9) Uani 1 1 d . . . 
H4A H -0.8800 1.1704 0.5178 0.068 Uiso 1 1 calc R . . 
C5 C -0.9709(3) 1.2758(3) 0.57243(18) 0.0586(9) Uani 1 1 d . . . 
H5A H -1.0445 1.2485 0.5820 0.070 Uiso 1 1 calc R . . 
C6 C -0.8224(3) 1.30404(19) 0.75541(16) 0.0425(7) Uani 1 1 d . . . 
H6A H -0.8454 1.3617 0.7788 0.051 Uiso 1 1 calc R . . 
C7 C -0.7154(2) 1.28487(19) 0.72423(15) 0.0382(7) Uani 1 1 d . . . 
H7A H -0.6517 1.3271 0.7225 0.046 Uiso 1 1 calc R . . 
C8 C -0.7170(2) 1.19433(18) 0.69453(15) 0.0324(6) Uani 1 1 d . . . 
C9 C -0.8268(2) 1.15694(17) 0.70811(15) 0.0331(6) Uani 1 1 d . . . 
C10 C -0.8905(2) 1.2263(2) 0.74534(15) 0.0365(6) Uani 1 1 d . . . 
H10A H -0.9691 1.2208 0.7608 0.044 Uiso 1 1 calc R . . 
C11 C -1.0234(2) 1.05185(18) 0.68726(18) 0.0412(7) Uani 1 1 d . . . 
C12 C -1.0896(3) 1.0552(2) 0.62341(19) 0.0567(9) Uani 1 1 d . . . 
H12A H -1.0561 1.0538 0.5761 0.068 Uiso 1 1 calc R . . 
C13 C -1.2053(3) 1.0607(2) 0.6289(3) 0.0717(11) Uani 1 1 d . . . 
H13A H -1.2488 1.0632 0.5856 0.086 Uiso 1 1 calc R . . 
C14 C -1.2551(3) 1.0624(2) 0.6978(3) 0.0686(11) Uani 1 1 d . . . 
H14A H -1.3328 1.0659 0.7014 0.082 Uiso 1 1 calc R . . 
C15 C -1.1911(3) 1.0589(2) 0.7622(2) 0.0591(9) Uani 1 1 d . . . 
H15A H -1.2253 1.0600 0.8093 0.071 Uiso 1 1 calc R . . 
C16 C -1.0761(2) 1.0538(2) 0.7567(2) 0.0507(8) Uani 1 1 d . . . 
H16A H -1.0331 1.0517 0.8003 0.061 Uiso 1 1 calc R . . 
C17 C -0.8303(2) 0.9713(2) 0.7518(2) 0.0491(8) Uani 1 1 d . . . 
C18 C -0.7947(3) 1.0003(3) 0.8209(2) 0.0588(9) Uani 1 1 d . . . 
H18A H -0.7949 1.0624 0.8321 0.071 Uiso 1 1 calc R . . 
C19 C -0.7579(3) 0.9374(3) 0.8751(3) 0.0834(14) Uani 1 1 d . . . 
H19A H -0.7333 0.9574 0.9220 0.100 Uiso 1 1 calc R . . 
C20 C -0.7586(3) 0.8461(3) 0.8583(3) 0.0935(16) Uani 1 1 d . . . 
H20A H -0.7344 0.8041 0.8941 0.112 Uiso 1 1 calc R . . 
C21 C -0.7945(4) 0.8160(3) 0.7896(4) 0.0984(16) Uani 1 1 d . . . 
H21A H -0.7951 0.7537 0.7791 0.118 Uiso 1 1 calc R . . 
C22 C -0.8298(3) 0.8774(2) 0.7359(3) 0.0735(11) Uani 1 1 d . . . 
H22A H -0.8533 0.8566 0.6890 0.088 Uiso 1 1 calc R . . 
C23 C -0.6223(2) 1.14440(19) 0.65595(16) 0.0394(7) Uani 1 1 d . . . 
H23A H -0.6533 1.1160 0.6105 0.047 Uiso 1 1 calc R . . 
C24 C -0.5254(2) 1.2060(2) 0.6310(2) 0.0572(9) Uani 1 1 d . . . 
H24A H -0.4690 1.1697 0.6067 0.086 Uiso 1 1 calc R . . 
H24B H -0.4936 1.2357 0.6743 0.086 Uiso 1 1 calc R . . 
H24C H -0.5528 1.2514 0.5965 0.086 Uiso 1 1 calc R . . 
C25 C -0.5380(2) 1.07816(19) 0.77616(17) 0.0388(7) Uani 1 1 d . . . 
C26 C -0.5269(3) 1.1529(2) 0.8242(2) 0.0597(10) Uani 1 1 d . . . 
H26A H -0.5498 1.2111 0.8098 0.072 Uiso 1 1 calc R . . 
C27 C -0.4805(3) 1.1367(3) 0.8940(2) 0.0728(11) Uani 1 1 d . . . 
H27A H -0.4728 1.1848 0.9278 0.087 Uiso 1 1 calc R . . 
C28 C -0.4449(3) 1.0499(3) 0.9147(2) 0.0680(10) Uani 1 1 d . . . 
H28A H -0.4128 1.0413 0.9619 0.082 Uiso 1 1 calc R . . 
C29 C -0.4558(3) 0.9775(2) 0.8677(2) 0.0572(9) Uani 1 1 d . . . 
H29A H -0.4325 0.9196 0.8826 0.069 Uiso 1 1 calc R . . 
C30 C -0.5025(2) 0.9913(2) 0.79697(18) 0.0427(7) Uani 1 1 d . . . 
C31 C -0.5660(2) 0.9788(2) 0.68526(19) 0.0458(8) Uani 1 1 d . . . 
C32 C -0.4957(3) 0.8879(2) 0.5540(2) 0.0524(9) Uani 1 1 d . . . 
C33 C -0.5155(4) 0.8581(3) 0.4815(2) 0.0795(12) Uani 1 1 d . . . 
H33A H -0.5857 0.8658 0.4595 0.095 Uiso 1 1 calc R . . 
C34 C -0.4295(5) 0.8165(3) 0.4420(2) 0.1021(16) Uani 1 1 d . . . 
H34A H -0.4423 0.7974 0.3928 0.123 Uiso 1 1 calc R . . 
C35 C -0.3280(5) 0.8030(4) 0.4727(3) 0.1059(16) Uani 1 1 d . . . 
H35A H -0.2717 0.7740 0.4455 0.127 Uiso 1 1 calc R . . 
C36 C -0.3083(4) 0.8330(3) 0.5453(3) 0.0937(14) Uani 1 1 d . . . 
H36A H -0.2380 0.8248 0.5668 0.112 Uiso 1 1 calc R . . 
C37 C -0.3920(3) 0.8750(2) 0.5862(2) 0.0649(10) Uani 1 1 d . . . 
H37A H -0.3784 0.8945 0.6352 0.078 Uiso 1 1 calc R . . 
N1 N -0.5211(2) 0.92999(17) 0.73885(16) 0.0509(7) Uani 1 1 d . . . 
 
loop_ 
 _atom_site_aniso_label 
 _atom_site_aniso_U_11 
 _atom_site_aniso_U_22 
 _atom_site_aniso_U_33 
 _atom_site_aniso_U_23 
 _atom_site_aniso_U_13 
 _atom_site_aniso_U_12 
Fe1 0.0391(2) 0.0343(2) 0.0377(2) 0.00345(19) -0.00201(19) 0.00371(18) 
P1 0.0400(4) 0.0346(4) 0.0501(5) -0.0024(4) 0.0034(4) -0.0018(3) 
S1 0.0640(6) 0.0848(7) 0.0826(7) -0.0431(6) -0.0225(5) 0.0250(5) 
N2 0.0337(13) 0.0379(14) 0.0417(15) -0.0004(11) -0.0004(11) 0.0042(10) 
C1 0.073(3) 0.055(2) 0.067(3) 0.0051(19) -0.017(2) 0.0206(19) 
C2 0.082(3) 0.050(2) 0.060(2) 0.0213(17) -0.015(2) -0.010(2) 
C3 0.062(2) 0.098(3) 0.040(2) 0.026(2) 0.0039(16) 0.013(2) 
C4 0.077(2) 0.055(2) 0.0374(19) 0.0025(17) -0.0104(17) 0.007(2) 
C5 0.054(2) 0.072(2) 0.050(2) 0.007(2) -0.0164(16) 0.0022(19) 
C6 0.0537(19) 0.0362(15) 0.0377(17) -0.0008(13) -0.0014(15) 0.0031(14) 
C7 0.0422(16) 0.0359(17) 0.0364(17) 0.0029(13) -0.0044(13) -0.0044(13) 
C8 0.0305(13) 0.0375(16) 0.0293(16) 0.0060(12) -0.0014(12) 0.0022(12) 
C9 0.0349(15) 0.0319(14) 0.0324(16) 0.0043(11) -0.0015(13) 0.0029(12) 
C10 0.0364(14) 0.0384(15) 0.0347(16) 0.0014(14) 0.0045(12) 0.0032(14) 
C11 0.0411(16) 0.0313(16) 0.051(2) 0.0018(14) -0.0034(14) -0.0063(13) 
C12 0.057(2) 0.064(2) 0.050(2) 0.0035(17) -0.0069(16) -0.0185(17) 
C13 0.048(2) 0.076(3) 0.091(3) 0.023(2) -0.030(2) -0.0184(18) 
C14 0.039(2) 0.057(2) 0.110(4) 0.023(2) -0.002(2) -0.0082(16) 
C15 0.050(2) 0.054(2) 0.073(3) 0.0066(19) 0.0143(18) -0.0013(16) 
C16 0.0411(18) 0.0489(19) 0.062(2) 0.0114(17) -0.0008(16) -0.0018(15) 
C17 0.0327(15) 0.0433(18) 0.071(2) 0.0109(16) 0.0030(17) 0.0026(14) 
C18 0.0449(19) 0.063(2) 0.069(2) 0.020(2) -0.0007(18) -0.0035(16) 
C19 0.053(2) 0.108(4) 0.090(3) 0.042(3) -0.011(2) -0.010(2) 
C20 0.063(3) 0.086(4) 0.131(5) 0.063(3) -0.006(3) -0.001(2) 
C21 0.083(3) 0.047(2) 0.166(5) 0.035(3) 0.006(3) 0.006(2) 
C22 0.065(2) 0.042(2) 0.114(3) 0.012(2) 0.001(2) 0.0034(18) 
C23 0.0354(14) 0.0458(17) 0.0369(18) 0.0019(13) -0.0021(13) 0.0057(12) 
C24 0.0419(17) 0.067(2) 0.063(2) 0.0221(18) 0.0105(16) 0.0040(15) 
C25 0.0356(16) 0.0384(17) 0.0423(19) -0.0007(14) -0.0002(13) 0.0055(13) 
C26 0.077(2) 0.0434(19) 0.059(2) -0.0047(17) -0.0169(19) 0.0177(17) 
C27 0.101(3) 0.060(2) 0.057(3) -0.013(2) -0.031(2) 0.025(2) 
C28 0.084(3) 0.072(3) 0.048(2) 0.004(2) -0.018(2) 0.023(2) 
C29 0.064(2) 0.0458(19) 0.062(2) 0.0121(18) -0.0002(18) 0.0141(16) 
C30 0.0389(17) 0.0397(18) 0.049(2) 0.0036(15) 0.0025(15) 0.0064(13) 
C31 0.0370(16) 0.0426(18) 0.058(2) -0.0118(16) -0.0021(15) 0.0072(14) 
C32 0.073(2) 0.0353(18) 0.049(2) -0.0037(15) -0.0033(18) 0.0029(16) 
C33 0.102(3) 0.083(3) 0.053(3) -0.002(2) -0.013(2) 0.025(2) 
C34 0.138(5) 0.120(4) 0.048(3) -0.012(3) 0.009(3) 0.033(4) 
C35 0.105(4) 0.138(4) 0.075(3) -0.021(3) 0.030(3) 0.022(3) 
C36 0.067(3) 0.124(4) 0.091(4) -0.024(3) 0.020(2) 0.007(2) 
C37 0.061(2) 0.068(2) 0.065(3) -0.012(2) 0.006(2) -0.0056(18) 
N1 0.0498(16) 0.0384(15) 0.065(2) -0.0038(14) -0.0064(14) 0.0072(12) 
 
_geom_special_details 
; 
 All esds (except the esd in the dihedral angle between two l.s. planes) 
 are estimated using the full covariance matrix.  The cell esds are taken 
 into account individually in the estimation of esds in distances, angles 
 and torsion angles; correlations between esds in cell parameters are only 
 used when they are defined by crystal symmetry.  An approximate (isotropic) 
 treatment of cell esds is used for estimating esds involving l.s. planes. 
; 
 
loop_ 
 _geom_bond_atom_site_label_1 
 _geom_bond_atom_site_label_2 
 _geom_bond_distance 
 _geom_bond_site_symmetry_2 
 _geom_bond_publ_flag 
Fe1 C4 2.031(3) . ? 
Fe1 C8 2.031(3) . ? 
Fe1 C3 2.033(3) . ? 
Fe1 C10 2.036(3) . ? 
Fe1 C9 2.037(3) . ? 
Fe1 C2 2.041(3) . ? 
Fe1 C5 2.043(3) . ? 
Fe1 C7 2.043(3) . ? 
Fe1 C6 2.052(3) . ? 
Fe1 C1 2.054(3) . ? 
P1 C9 1.812(3) . ? 
P1 C17 1.820(3) . ? 
P1 C11 1.838(3) . ? 
S1 C31 1.755(3) . ? 
S1 C32 1.771(4) . ? 
N2 C25 1.375(4) . ? 
N2 C31 1.387(3) . ? 
N2 C23 1.475(3) . ? 
C1 C2 1.377(5) . ? 
C1 C5 1.394(5) . ? 
C2 C3 1.417(5) . ? 
C3 C4 1.425(5) . ? 
C4 C5 1.388(5) . ? 
C6 C10 1.410(4) . ? 
C6 C7 1.420(4) . ? 
C7 C8 1.426(4) . ? 
C8 C9 1.440(4) . ? 
C8 C23 1.510(4) . ? 
C9 C10 1.429(4) . ? 
C11 C12 1.382(4) . ? 
C11 C16 1.383(4) . ? 
C12 C13 1.386(5) . ? 
C13 C14 1.360(5) . ? 
C14 C15 1.376(5) . ? 
C15 C16 1.378(4) . ? 
C17 C18 1.366(4) . ? 
C17 C22 1.402(4) . ? 
C18 C19 1.403(5) . ? 
C19 C20 1.367(6) . ? 
C20 C21 1.366(7) . ? 
C21 C22 1.376(6) . ? 
C23 C24 1.532(4) . ? 
C25 C30 1.389(4) . ? 
C25 C26 1.392(4) . ? 
C26 C27 1.378(5) . ? 
C27 C28 1.389(5) . ? 
C28 C29 1.354(5) . ? 
C29 C30 1.389(4) . ? 
C30 N1 1.385(4) . ? 
C31 N1 1.304(4) . ? 
C32 C37 1.376(5) . ? 
C32 C33 1.380(5) . ? 
C33 C34 1.385(6) . ? 
C34 C35 1.343(6) . ? 
C35 C36 1.381(6) . ? 
C36 C37 1.379(5) . ? 
 
loop_ 
 _geom_angle_atom_site_label_1 
 _geom_angle_atom_site_label_2 
 _geom_angle_atom_site_label_3 
 _geom_angle 
 _geom_angle_site_symmetry_1 
 _geom_angle_site_symmetry_3 
 _geom_angle_publ_flag 
C4 Fe1 C8 116.23(13) . . ? 
C4 Fe1 C3 41.05(14) . . ? 
C8 Fe1 C3 109.83(13) . . ? 
C4 Fe1 C10 130.28(12) . . ? 
C8 Fe1 C10 69.10(11) . . ? 
C3 Fe1 C10 170.53(15) . . ? 
C4 Fe1 C9 107.79(13) . . ? 
C8 Fe1 C9 41.46(11) . . ? 
C3 Fe1 C9 132.02(14) . . ? 
C10 Fe1 C9 41.09(11) . . ? 
C4 Fe1 C2 68.35(14) . . ? 
C8 Fe1 C2 133.21(14) . . ? 
C3 Fe1 C2 40.69(14) . . ? 
C10 Fe1 C2 146.59(14) . . ? 
C9 Fe1 C2 172.15(15) . . ? 
C4 Fe1 C5 39.85(13) . . ? 
C8 Fe1 C5 147.48(13) . . ? 
C3 Fe1 C5 67.65(14) . . ? 
C10 Fe1 C5 107.87(13) . . ? 
C9 Fe1 C5 114.54(13) . . ? 
C2 Fe1 C5 67.28(15) . . ? 
C4 Fe1 C7 149.45(13) . . ? 
C8 Fe1 C7 40.96(10) . . ? 
C3 Fe1 C7 117.50(14) . . ? 
C10 Fe1 C7 68.29(11) . . ? 
C9 Fe1 C7 69.06(11) . . ? 
C2 Fe1 C7 110.50(13) . . ? 
C5 Fe1 C7 170.09(13) . . ? 
C4 Fe1 C6 168.78(13) . . ? 
C8 Fe1 C6 68.82(11) . . ? 
C3 Fe1 C6 148.81(14) . . ? 
C10 Fe1 C6 40.34(11) . . ? 
C9 Fe1 C6 68.79(11) . . ? 
C2 Fe1 C6 116.32(13) . . ? 
C5 Fe1 C6 130.78(13) . . ? 
C7 Fe1 C6 40.56(11) . . ? 
C4 Fe1 C1 66.99(15) . . ? 
C8 Fe1 C1 171.50(14) . . ? 
C3 Fe1 C1 66.93(15) . . ? 
C10 Fe1 C1 115.46(14) . . ? 
C9 Fe1 C1 146.55(14) . . ? 
C2 Fe1 C1 39.30(14) . . ? 
C5 Fe1 C1 39.78(14) . . ? 
C7 Fe1 C1 132.56(14) . . ? 
C6 Fe1 C1 109.55(14) . . ? 
C9 P1 C17 102.12(14) . . ? 
C9 P1 C11 101.66(13) . . ? 
C17 P1 C11 101.40(14) . . ? 
C31 S1 C32 105.73(15) . . ? 
C25 N2 C31 105.4(2) . . ? 
C25 N2 C23 127.0(2) . . ? 
C31 N2 C23 127.6(3) . . ? 
C2 C1 C5 109.5(3) . . ? 
C2 C1 Fe1 69.85(19) . . ? 
C5 C1 Fe1 69.68(19) . . ? 
C1 C2 C3 107.5(3) . . ? 
C1 C2 Fe1 70.8(2) . . ? 
C3 C2 Fe1 69.33(18) . . ? 
C2 C3 C4 107.2(3) . . ? 
C2 C3 Fe1 69.98(19) . . ? 
C4 C3 Fe1 69.39(18) . . ? 
C5 C4 C3 107.5(3) . . ? 
C5 C4 Fe1 70.56(18) . . ? 
C3 C4 Fe1 69.56(19) . . ? 
C4 C5 C1 108.2(3) . . ? 
C4 C5 Fe1 69.59(18) . . ? 
C1 C5 Fe1 70.54(19) . . ? 
C10 C6 C7 108.0(2) . . ? 
C10 C6 Fe1 69.19(15) . . ? 
C7 C6 Fe1 69.38(16) . . ? 
C6 C7 C8 108.4(2) . . ? 
C6 C7 Fe1 70.06(16) . . ? 
C8 C7 Fe1 69.06(15) . . ? 
C7 C8 C9 107.6(2) . . ? 
C7 C8 C23 127.4(2) . . ? 
C9 C8 C23 125.0(2) . . ? 
C7 C8 Fe1 69.98(15) . . ? 
C9 C8 Fe1 69.50(14) . . ? 
C23 C8 Fe1 126.15(19) . . ? 
C10 C9 C8 107.0(2) . . ? 
C10 C9 P1 129.5(2) . . ? 
C8 C9 P1 123.3(2) . . ? 
C10 C9 Fe1 69.39(15) . . ? 
C8 C9 Fe1 69.04(15) . . ? 
P1 C9 Fe1 122.45(14) . . ? 
C6 C10 C9 108.9(2) . . ? 
C6 C10 Fe1 70.47(16) . . ? 
C9 C10 Fe1 69.52(15) . . ? 
C12 C11 C16 118.1(3) . . ? 
C12 C11 P1 117.7(2) . . ? 
C16 C11 P1 124.2(2) . . ? 
C11 C12 C13 120.8(4) . . ? 
C14 C13 C12 120.0(4) . . ? 
C13 C14 C15 120.2(3) . . ? 
C14 C15 C16 119.7(4) . . ? 
C15 C16 C11 121.1(3) . . ? 
C18 C17 C22 119.0(3) . . ? 
C18 C17 P1 125.1(3) . . ? 
C22 C17 P1 115.8(3) . . ? 
C17 C18 C19 120.6(4) . . ? 
C20 C19 C18 119.3(4) . . ? 
C21 C20 C19 120.8(4) . . ? 
C20 C21 C22 120.3(4) . . ? 
C21 C22 C17 120.0(4) . . ? 
N2 C23 C8 110.8(2) . . ? 
N2 C23 C24 109.6(2) . . ? 
C8 C23 C24 114.3(2) . . ? 
N2 C25 C30 106.2(3) . . ? 
N2 C25 C26 132.1(3) . . ? 
C30 C25 C26 121.7(3) . . ? 
C27 C26 C25 117.0(3) . . ? 
C26 C27 C28 121.3(3) . . ? 
C29 C28 C27 121.4(3) . . ? 
C28 C29 C30 118.8(3) . . ? 
N1 C30 C29 130.0(3) . . ? 
N1 C30 C25 110.2(3) . . ? 
C29 C30 C25 119.7(3) . . ? 
N1 C31 N2 113.4(3) . . ? 
N1 C31 S1 125.9(2) . . ? 
N2 C31 S1 120.6(2) . . ? 
C37 C32 C33 119.9(4) . . ? 
C37 C32 S1 126.1(3) . . ? 
C33 C32 S1 114.0(3) . . ? 
C32 C33 C34 119.0(4) . . ? 
C35 C34 C33 121.8(4) . . ? 
C34 C35 C36 119.0(4) . . ? 
C37 C36 C35 120.7(4) . . ? 
C32 C37 C36 119.6(4) . . ? 
C31 N1 C30 104.8(2) . . ? 
 
_diffrn_measured_fraction_theta_max    1.000 
_diffrn_reflns_theta_full              25.00 
_diffrn_measured_fraction_theta_full   1.000 
_refine_diff_density_max    0.236 
_refine_diff_density_min   -0.222 
_refine_diff_density_rms    0.039 
